# Supplementary material for: Effect of A Very Low-Calorie Ketogenic Diet on Food and Alcohol Cravings, Physical and Sexual Activity, Sleep Disturbances, and Quality of Life in Obese Patients
Source: PubMed Central journal article supplement (PMC6213862; doi:10.3390/nu10101348), 2018-09-21
Supplement: nutrients-10-01348-s001.pdf [file nutrients-10-01348-s001.pdf]

# Effect of A Very Low-Calorie Ketogenic Diet on Food and Alcohol Cravings, Physical and Sexual Activity, Sleep Disturbances, and Quality of Life in Obese Patients

Ana I Castro <sup>1,2,†</sup>, Diego Gomez-Arbelaez <sup>1,3,†</sup>, Ana B Crujeiras <sup>1,2,†</sup>, Roser Granero <sup>2,4</sup>,

Zaida Aguera <sup>2,5</sup>, Susana Jimenez-Murcia <sup>2,5</sup>, Ignacio Sajoux <sup>6</sup>, Patricio Lopez-Jaramillo <sup>7</sup>, Fernando Fernandez-Aranda <sup>2,5,‡</sup> and Felipe F Casanueva <sup>1,2,\*,‡</sup>

<sup>1</sup> Division of Endocrinology, Department of Medicine, Molecular and Cellular Endocrinology Area, Complejo Hospitalario Universitario de Santiago (CHUS), Instituto de Investigación Sanitaria de Santiago (IDIS), and Santiago de Compostela University (USC), Santiago de Compostela (15706), Spain; [anaisabel0121@gmail.com](mailto:anaisabel0121@gmail.com) (A.I.C.); [diedgomez@gmail.com](mailto:diedgomez@gmail.com) (D.G-A.); [anabelecrujeiras@hotmail.com](mailto:anabelecrujeiras@hotmail.com) (A.B.C.); [endocrine@usc.es](mailto:endocrine@usc.es) (F.F.C)

<sup>2</sup> CIBER de Fisiopatología de la Obesidad y Nutrición (CIBERObn), Instituto Salud Carlos III; Madrid (28029) Spain

<sup>3</sup> Faculty of Health Sciences, University of Santander (UDES), Bucaramanga (680003), Colombia

<sup>4</sup> Department of Psychobiology and Methodology, Autonomous University of Barcelona, Barcelona (08193), Spain; [Roser.Granero@uab.cat](mailto:Roser.Granero@uab.cat)

<sup>5</sup> Department of Psychiatry, Bellvitge University Hospital-IDIBELL, (08908), Spain; [zaguera@bellvitgehospital.cat](mailto:zaguera@bellvitgehospital.cat) (Z.A.); [sjimenez@bellvitgehospital.cat](mailto:sjimenez@bellvitgehospital.cat) (S.J-M.); [ffernandez@bellvitgehospital.cat](mailto:ffernandez@bellvitgehospital.cat) (F.F-A.)

<sup>6</sup> Medical Department Pronokal, Pronokal Group, Barcelona (08009) Spain; [Ignacio.S@pronokal.com](mailto:Ignacio.S@pronokal.com)

<sup>7</sup> Center for Research in Metabolic Syndrome, Prediabetes and Diabetes, Fundacion Oftalmologica de Santander (FOSCAL), Floridablanca (681004) Colombia; [jplopezj@gmail.com](mailto:jplopezj@gmail.com)

† These authors contributed equally to this work and should be considered co-first authors.

‡ Both authors contributed equally to this work and should be considered co-main authors.

\* Correspondence: [endocrine@usc.es](mailto:endocrine@usc.es); Tel.: +34-981-955-069

**Table S1.** Evolution of the questionnaires in the 4 assessments through the intervention (n=20)

|                                               | Assessment 1 |       | Assessment 2 |       | Assessment 3 |       | Assessment 4 |       | Trends |        |       | Ass.1 vs 2 |       | Ass.1 vs 3 |       | Ass.1 vs 4 |       | Ass.2 vs 3 |       | Ass.2 vs 4 |       | Ass.3 vs 4 |       |
|-----------------------------------------------|--------------|-------|--------------|-------|--------------|-------|--------------|-------|--------|--------|-------|------------|-------|------------|-------|------------|-------|------------|-------|------------|-------|------------|-------|
|                                               | Mean         | SD    | Mean         | SD    | Mean         | SD    | Mean         | SD    | Linear | Quadr. | Cubic | p          | d     | p          | d     | p          | d     | p          | d     | p          | d     | p          | d     |
| <b>Food Craving Questionnaire - Trait</b>     |              |       |              |       |              |       |              |       |        |        |       |            |       |            |       |            |       |            |       |            |       |            |       |
| Positive reinforcement                        | 16.17        | 3.91  | 14.95        | 3.72  | 12.11        | 3.25  | 12.63        | 3.48  | .004*  | .256   | .151  | .329       | 0.32  | .004*      | 1.13† | .014*      | 0.95† | .006*      | 0.81† | .022*      | 0.64† | .621       | 0.15  |
| Negative reinforcement                        | 8.33         | 3.22  | 7.37         | 2.77  | 6.53         | 2.52  | 6.00         | 2.40  | .007*  | .606   | .977  | .276       | 0.32  | .033*      | 0.62† | .019*      | 0.82† | .105       | 0.32  | .007*      | 0.53† | .395       | 0.22  |
| Intentions to eat                             | 8.56         | 3.11  | 6.26         | 2.79  | 5.68         | 2.56  | 6.32         | 2.87  | .014*  | .008*  | .825  | .028*      | 0.78† | .004*      | 1.01† | .025*      | 0.75† | .179       | 0.22  | .756       | 0.02  | .269       | 0.24  |
| Cue-dependent eating                          | 15.00        | 3.58  | 10.11        | 4.53  | 9.63         | 3.24  | 10.32        | 3.30  | <.001* | .001*  | .296  | .001*      | 1.20† | <.001*     | 1.57† | <.001*     | 1.36† | .541       | 0.12  | .898       | 0.05  | .386       | 0.21  |
| Thoughts-preoccupations food                  | 16.78        | 6.92  | 13.32        | 5.56  | 12.05        | 5.79  | 12.47        | 5.06  | .006*  | .034*  | .871  | .031*      | 0.55† | .007*      | 0.74† | .008*      | 0.71† | .085       | 0.22  | .200       | 0.16  | .540       | 0.08  |
| Feelings of hunger                            | 13.94        | 3.75  | 11.11        | 3.40  | 9.68         | 3.13  | 10.11        | 2.77  | <.001* | .005*  | .649  | .010*      | 0.79† | <.001*     | 1.23† | .001*      | 1.17† | .003*      | 0.44  | .021       | 0.32  | .331       | 0.15  |
| Lack of control                               | 20.39        | 5.47  | 12.95        | 4.68  | 11.16        | 4.79  | 12.79        | 4.25  | <.001* | <.001* | .489  | <.001*     | 1.46† | <.001*     | 1.80† | <.001*     | 1.55† | .120       | 0.38  | .654       | 0.04  | .074       | 0.36  |
| Negative affect                               | 12.50        | 5.31  | 9.05         | 3.85  | 8.95         | 4.16  | 9.21         | 3.44  | .003*  | .056   | .094  | .011*      | 0.74† | .017*      | 0.75† | .002*      | 0.74† | .923       | 0.02  | .815       | 0.04  | .770       | 0.07  |
| Guilty feelings                               | 10.44        | 3.91  | 7.05         | 3.41  | 6.26         | 2.90  | 7.00         | 2.75  | .004*  | .001*  | .604  | .003*      | 0.92† | .001*      | 1.21† | .003*      | 1.02† | .362       | 0.25  | .935       | 0.02  | .111       | 0.26  |
| Total trait score                             | 122.11       | 27.93 | 92.16        | 27.78 | 82.05        | 27.80 | 86.84        | 23.70 | <.001* | .002*  | .709  | .003*      | 1.08† | <.001*     | 1.44† | <.001*     | 1.36† | .030*      | 0.36  | .111       | 0.21  | .240       | 0.19  |
| <b>Food Craving Questionnaire - State</b>     |              |       |              |       |              |       |              |       |        |        |       |            |       |            |       |            |       |            |       |            |       |            |       |
| Intense desire to eat                         | 6.33         | 4.13  | 5.68         | 2.89  | 5.00         | 2.71  | 5.26         | 3.26  | .172   | .300   | .833  | .267       | 0.18  | .152       | 0.38  | .178       | 0.29  | .454       | 0.24  | .747       | 0.14  | .633       | 0.09  |
| Anticipation positive reinforcement           | 6.83         | 3.24  | 6.16         | 3.06  | 5.32         | 2.33  | 5.47         | 2.70  | .151   | .464   | .530  | .494       | 0.21  | .122       | 0.54† | .202       | 0.46  | .229       | 0.31  | .451       | 0.24  | .712       | 0.06  |
| Anticipation negative states                  | 6.89         | 3.08  | 5.42         | 2.89  | 4.47         | 2.78  | 5.84         | 3.08  | .264   | .006*  | .374  | .044*      | 0.49† | .015*      | 0.82† | .357       | 0.34  | .177       | 0.34  | .499       | 0.14  | .064       | 0.47  |
| Preoccupation with food-lack control          | 7.44         | 3.13  | 3.84         | 1.21  | 3.89         | 1.45  | 4.63         | 2.09  | .003*  | <.001* | .002* | <.001*     | 1.52† | <.001*     | 1.46† | .001*      | 1.06† | .863       | 0.04  | .115       | 0.46  | .103       | 0.41  |
| Craving as physiological state                | 8.06         | 3.65  | 7.16         | 2.65  | 7.95         | 3.50  | 8.00         | 3.67  | .772   | .286   | .349  | .128       | 0.28  | .782       | 0.03  | .998       | 0.02  | .377       | 0.25  | .195       | 0.26  | .748       | 0.01  |
| Total state score                             | 35.56        | 11.99 | 28.26        | 10.66 | 26.63        | 10.80 | 29.21        | 10.86 | .096   | .007*  | .759  | .005*      | 0.64† | .023*      | 0.78† | .069       | 0.55† | .587       | 0.15  | .543       | 0.09  | .119       | 0.24  |
| <b>Food Craving Inventory (FCI, SP)</b>       |              |       |              |       |              |       |              |       |        |        |       |            |       |            |       |            |       |            |       |            |       |            |       |
| Simple sugars/trans fats                      | 16.68        | 10.86 | 8.79         | 7.79  | 8.79         | 7.13  | 9.21         | 7.76  | .002*  | .002*  | .076  | .001*      | 0.84† | .001*      | 0.86† | .001*      | 0.79† | .998       | 0.00  | .744       | 0.05  | .623       | 0.06  |
| Complex carbohydrates/proteins                | 12.89        | 5.35  | 11.11        | 6.91  | 8.00         | 5.73  | 8.84         | 6.18  | .004*  | .259   | .214  | .337       | 0.29  | .008*      | 0.88† | .009*      | 0.70† | .039*      | 0.50† | .145       | 0.35  | .346       | 0.14  |
| Saturated fat/high calorie content            | 6.00         | 3.06  | 4.79         | 3.52  | 3.53         | 2.72  | 3.74         | 2.49  | <.001* | .319   | .384  | .250       | 0.37  | .012*      | 0.86† | .001*      | 0.81† | .021*      | 0.40  | .126       | 0.34  | .695       | 0.08  |
| <b>Multidim. Craving Alcohol Scale (MACS)</b> |              |       |              |       |              |       |              |       |        |        |       |            |       |            |       |            |       |            |       |            |       |            |       |
| <b>Women ; n=12</b>                           |              |       |              |       |              |       |              |       |        |        |       |            |       |            |       |            |       |            |       |            |       |            |       |
| Desire                                        | 14.08        | 4.93  | 13.33        | 4.91  | 13.42        | 7.54  | 14.92        | 8.85  | .734   | .312   | .919  | .648       | 0.15  | .662       | 0.10  | .685       | 0.12  | .970       | 0.01  | .555       | 0.22  | .260       | 0.18  |
| Lack of inhibition                            | 5.17         | 2.79  | 5.17         | 2.79  | 5.25         | 2.80  | 3.50         | 2.47  | .183   | .260   | .621  | 1.000      | 0.00  | .944       | 0.03  | .193       | 0.63† | .940       | 0.03  | .069       | 0.63† | .082       | 0.66† |
| Total score                                   | 19.25        | 5.66  | 18.50        | 5.52  | 18.67        | 6.91  | 18.42        | 8.66  | .754   | .817   | .834  | .686       | 0.13  | .653       | 0.09  | .693       | 0.11  | .941       | 0.03  | .975       | 0.01  | .859       | 0.03  |
| <b>Men; n=8</b>                               |              |       |              |       |              |       |              |       |        |        |       |            |       |            |       |            |       |            |       |            |       |            |       |
| Desire                                        | 14.00        | 5.66  | 11.43        | 2.51  | 12.43        | 3.51  | 12.29        | 3.35  | .589   | .339   | .063  | .289       | 0.59† | .546       | 0.33  | .489       | 0.37  | .111       | 0.33  | .078       | 0.29  | .604       | 0.04  |
| Lack of inhibition                            | 5.86         | 3.08  | 3.71         | 3.15  | 4.86         | 3.08  | 5.00         | 3.11  | .670   | .271   | .090  | .042*      | 0.69† | .420       | 0.32  | .395       | 0.28  | .188       | 0.37  | .329       | 0.41  | .909       | 0.05  |
| Total score                                   | 19.86        | 6.89  | 15.14        | 3.24  | 17.29        | 4.42  | 17.29        | 5.44  | .597   | .099   | .047* | .047*      | 0.88† | .402       | 0.44  | .439       | 0.41  | .145       | 0.55† | .208       | 0.52† | 1.000      | 0.00  |
| <b>Total; n=20</b>                            |              |       |              |       |              |       |              |       |        |        |       |            |       |            |       |            |       |            |       |            |       |            |       |
| Desire                                        | 14.05        | 5.05  | 12.63        | 4.21  | 13.05        | 6.25  | 13.95        | 7.30  | .984   | .153   | .708  | .280       | 0.31  | .440       | 0.18  | .945       | 0.02  | .759       | 0.08  | .429       | 0.22  | .285       | 0.13  |
| Lack of inhibition                            | 5.42         | 2.83  | 4.63         | 2.93  | 5.11         | 2.83  | 4.05         | 2.74  | .156   | .831   | .274  | .416       | 0.27  | .710       | 0.11  | .113       | 0.46  | .527       | 0.17  | .448       | 0.20  | .172       | 0.38  |
| Total score                                   | 19.47        | 5.96  | 17.26        | 4.99  | 18.16        | 6.01  | 18.00        | 7.48  | .545   | .224   | .330  | .141       | 0.40  | .322       | 0.22  | .394       | 0.22  | .549       | 0.16  | .675       | 0.12  | .873       | 0.02  |

|                                       | Assessment 1 |       | Assessment 2 |        | Assessment 3 |       | Assessment 4 |        | Trends           |              |       | Ass. 1 vs 2      |              | Ass. 1 vs 3      |              | Ass. 1 vs 4      |              | Ass. 2 vs 3      |              | Ass. 2 vs 4  |              | Ass. 3 vs 4  |              |
|---------------------------------------|--------------|-------|--------------|--------|--------------|-------|--------------|--------|------------------|--------------|-------|------------------|--------------|------------------|--------------|------------------|--------------|------------------|--------------|--------------|--------------|--------------|--------------|
|                                       | Mean         | SD    | Mean         | SD     | Mean         | SD    | Mean         | SD     | Linear           | Quadr.       | Cubic | p                | d            | p                | d            | p                | d            | p                | d            | p            | d            | p            | d            |
| EPWORTH daily sleep: total score      | 9.68         | 5.19  | 8.05         | 4.84   | 7.21         | 4.43  | 8.58         | 4.66   | .122             | <b>.010*</b> | .499  | .065             | 0.33         | <b>.010*</b>     | <b>0.51†</b> | .191             | 0.22         | .212             | 0.18         | .416         | 0.11         | <b>.036*</b> | 0.30         |
| Pittsburgh Sleep Quality Index: total | 6.63         | 4.30  | 5.79         | 4.34   | 5.21         | 3.03  | 5.74         | 3.93   | .173             | .121         | .621  | .269             | 0.19         | .062             | 0.38         | .245             | 0.22         | .265             | 0.15         | .918         | 0.01         | .262         | 0.15         |
| Physical activity; IPQA               |              |       |              |        |              |       |              |        |                  |              |       |                  |              |                  |              |                  |              |                  |              |              |              |              |              |
| Walking (meters/week)                 | 805.2        | 909.3 | 1603.1       | 2830.1 | 1038.7       | 879.9 | 1894.1       | 2336.9 | <b>.050*</b>     | .913         | .204  | .244             | 0.38         | .176             | 0.26         | .062             | <b>0.95†</b> | .326             | 0.27         | .508         | 0.13         | .089         | <b>0.76†</b> |
| Moderate activity (minutes-week)      | 292.1        | 969.0 | 348.3        | 798.0  | 437.5        | 854.1 | 289.3        | 623.7  | .864             | .376         | .577  | .723             | 0.06         | .457             | 0.16         | .924             | 0.00         | .587             | 0.11         | .615         | 0.08         | .382         | 0.20         |
| Vigorous activity (minutes-week)      | 99.5         | 199.5 | 148.4        | 137.6  | 189.5        | 463.0 | 128.2        | 147.2  | .125             | .196         | .826  | <b>.032*</b>     | 0.29         | .242             | 0.25         | .107             | 0.16         | .671             | 0.12         | .665         | 0.14         | .584         | 0.18         |
| Sexual activity (women; n=12)         |              |       |              |        |              |       |              |        |                  |              |       |                  |              |                  |              |                  |              |                  |              |              |              |              |              |
| Desire                                | 5.71         | 1.98  | 6.38         | 1.92   | 6.67         | 0.82  | 6.25         | 2.25   | .564             | .341         | .703  | .530             | 0.34         | .317             | <b>0.63†</b> | .709             | 0.25         | .580             | 0.20         | 1.000        | 0.06         | .636         | 0.25         |
| Excitation                            | 6.86         | 1.68  | 8.00         | 2.88   | 8.83         | 2.40  | 8.00         | 2.83   | <b>.043*</b>     | .249         | .164  | .289             | <b>0.50†</b> | <b>.010*</b>     | <b>0.99†</b> | .080             | <b>0.51†</b> | <b>.025*</b>     | 0.31         | .341         | 0.00         | .456         | 0.32         |
| Lubrication                           | 2.29         | 0.95  | 3.00         | 1.20   | 3.17         | 0.98  | 2.50         | 1.20   | <b>.013*</b>     | .203         | .661  | .235             | <b>0.66†</b> | <b>.041*</b>     | <b>0.91†</b> | <b>.025</b>      | 0.20         | .175             | 0.15         | 1.000        | 0.42         | .175         | <b>0.61†</b> |
| Orgasmic                              | 2.43         | 1.40  | 3.38         | 0.74   | 2.67         | 1.51  | 3.38         | 0.74   | .168             | .456         | .091  | <b>.034*</b>     | <b>0.85†</b> | .203             | 0.16         | .135             | <b>0.85†</b> | .102             | <b>0.60†</b> | 1.000        | 0.00         | .363         | <b>0.60†</b> |
| Penetration                           | 4.71         | 1.60  | 4.50         | 1.31   | 3.83         | 0.98  | 3.50         | 1.77   | .312             | .296         | .451  | .849             | 0.15         | .076             | <b>0.66†</b> | .516             | <b>0.72†</b> | .141             | <b>0.58†</b> | .203         | <b>0.64†</b> | .576         | 0.23         |
| Previous anxiety                      | 1.29         | 1.60  | 0.50         | 0.53   | 0.17         | 0.41  | 0.38         | 0.52   | .246             | .062         | 1.000 | .175             | <b>0.66†</b> | .121             | <b>0.96†</b> | .275             | <b>0.76†</b> | .175             | <b>0.70†</b> | 1.000        | 0.24         | .175         | 0.45         |
| Sexual activity (men; n=8)            |              |       |              |        |              |       |              |        |                  |              |       |                  |              |                  |              |                  |              |                  |              |              |              |              |              |
| Overall sexual functioning            | 13.57        | 9.71  | 14.29        | 10.06  | 15.43        | 11.39 | 15.00        | 11.08  | .455             | .321         | .647  | .564             | 0.07         | .308             | 0.18         | .529             | 0.14         | .425             | 0.11         | .582         | 0.07         | .760         | 0.04         |
| Sexual function distress              | 0.29         | 0.76  | 0.43         | 1.13   | 0.00         | 0.00  | 0.00         | 0.00   | .200             | .805         | .491  | .805             | 0.15         | .356             | <b>0.53†</b> | .356             | <b>0.53†</b> | .356             | <b>0.53†</b> | .356         | <b>0.53†</b> | 1.000        | 0.00         |
| Change sexual functioning             | -1.14        | 1.46  | -0.43        | 1.13   | 0.29         | 2.93  | 0.71         | 3.95   | .350             | .569         | .793  | .283             | <b>0.55†</b> | .340             | <b>0.62†</b> | .337             | <b>0.62†</b> | .454             | 0.32         | .419         | 0.39         | .356         | 0.12         |
| Masturbation                          | 1.14         | 1.57  | 0.86         | 1.57   | 0.86         | 1.57  | 0.57         | 0.98   | .172             | 1.000        | .172  | .356             | 0.18         | .356             | 0.18         | .172             | 0.44         | 1.000            | 0.00         | .356         | 0.22         | .356         | 0.22         |
| Impact of Weight on Quality of Life   |              |       |              |        |              |       |              |        |                  |              |       |                  |              |                  |              |                  |              |                  |              |              |              |              |              |
| Physical                              | 30.53        | 9.60  | 21.05        | 9.40   | 15.84        | 6.22  | 14.05        | 2.95   | <b>&lt;.001*</b> | <b>.002*</b> | .779  | <b>&lt;.001*</b> | <b>1.00†</b> | <b>&lt;.001*</b> | <b>1.82†</b> | <b>&lt;.001*</b> | <b>2.32†</b> | <b>&lt;.001*</b> | <b>0.65†</b> | <b>.001*</b> | <b>1.00†</b> | .084         | 0.37         |
| Sexual life                           | 8.16         | 4.63  | 7.05         | 4.64   | 5.21         | 2.46  | 4.37         | 1.01   | <b>.001*</b>     | .761         | .219  | .076             | 0.24         | <b>&lt;.001*</b> | <b>0.79†</b> | <b>.001*</b>     | <b>1.13†</b> | <b>.010*</b>     | <b>0.50†</b> | <b>.019*</b> | <b>0.80†</b> | .119         | 0.45         |
| Self-steam                            | 17.84        | 7.01  | 12.68        | 6.47   | 9.21         | 3.54  | 8.32         | 2.73   | <b>&lt;.001*</b> | <b>.003*</b> | .734  | <b>&lt;.001*</b> | <b>0.76†</b> | <b>&lt;.001*</b> | <b>1.55†</b> | <b>&lt;.001*</b> | <b>1.79†</b> | <b>.005*</b>     | <b>0.67†</b> | <b>.003*</b> | <b>0.88†</b> | <b>.034*</b> | 0.28         |
| Social anxiety                        | 6.53         | 3.56  | 6.16         | 3.15   | 5.37         | 1.16  | 5.11         | 0.32   | .080             | .607         | .232  | <b>.049*</b>     | 0.11         | .059             | 0.44         | .076             | <b>0.56†</b> | .118             | 0.33         | .128         | 0.47         | .235         | 0.31         |
| Work area                             | 6.84         | 3.42  | 6.21         | 3.74   | 4.89         | 1.63  | 4.16         | 0.37   | <b>.004*</b>     | .852         | .366  | .117             | 0.18         | <b>.001*</b>     | <b>0.73†</b> | <b>.003*</b>     | <b>1.10†</b> | <b>.044*</b>     | <b>0.51†</b> | <b>.029*</b> | <b>0.77†</b> | <b>.049*</b> | <b>0.62†</b> |
| Total score                           | 69.89        | 22.03 | 53.16        | 23.79  | 40.53        | 13.31 | 36.00        | 5.58   | <b>&lt;.001*</b> | <b>.005*</b> | .546  | <b>&lt;.001*</b> | <b>0.73†</b> | <b>&lt;.001*</b> | <b>1.61†</b> | <b>&lt;.001*</b> | <b>2.11†</b> | <b>&lt;.001*</b> | <b>0.66†</b> | <b>.002*</b> | <b>0.99†</b> | .056         | 0.44         |

Note. SD: standard deviation. MD: mean difference. \*Bold: significant comparison (.05 level). †Bold: effect size into the moderate ( $|d|>0.50$ ) to good range ( $|d|>0.80$ ). 1. Baseline, 2. Maximum ketosis, 3. Reduced ketosis, 4. Endpoint
